# Supplementary material
Source: ML conference proceedings conference paper supplement (https://proceedings.mlr.press/v51/choi16.html)
Supplement: Supplementary file 1 [file choi16-supp.pdf]

---

# Supplementary Material

## Fast and Scalable Structural SVM with Slack Rescaling

---

### Appendix A Details of binary search

**Lemma 1.** Let  $\bar{F}(\lambda) = \frac{1}{4} \max_{y \in \mathcal{Y}^+} \left( \frac{1}{\lambda} h(y) + \lambda g(y) \right)^2$ , then

$$\max_{y \in \mathcal{Y}} \Phi(y) \leq \min_{\lambda > 0} \bar{F}(\lambda)$$

and  $\bar{F}(\lambda)$  is a convex function in  $\lambda$ .

*Proof.* First, let  $\mathcal{Y}^+ = \{y | y \in \mathcal{Y}, h(y) > 0\}$ , then  $\max_{y \in \mathcal{Y}} \Phi(y) = \max_{y \in \mathcal{Y}^+} \Phi(y)$ , since any solution  $y$  such that  $h(y) < 0$  is dominated by  $y_i$ , which has zero loss. Second, we prove the bound w.r.t.  $y \in \mathcal{Y}^+$ . In the following proof we use a quadratic bound (for a similar bound see [9]).

$$\begin{aligned} \max_{y \in \mathcal{Y}^+} \Phi(y) &= \max_{y \in \mathcal{Y}^+} h(y)g(y) = \max_{y \in \mathcal{Y}^+} \frac{1}{4} \left( 2\sqrt{h(y)g(y)} \right)^2 \\ &= \frac{1}{4} \left( \max_{y \in \mathcal{Y}^+} \min_{\lambda > 0} \left\{ \frac{1}{\lambda} h(y) + \lambda g(y) \right\} \right)^2 \\ &\leq \frac{1}{4} \left( \min_{\lambda > 0} \max_{y \in \mathcal{Y}^+} \left\{ \frac{1}{\lambda} h(y) + \lambda g(y) \right\} \right)^2 \end{aligned} \quad (13)$$

To see the convexity of  $\bar{F}(\lambda)$ , we differentiate twice to obtain:

$$\frac{\partial^2 \bar{F}(\lambda)}{\partial \lambda^2} = \frac{1}{4} \max_{y \in \mathcal{Y}^+} 6 \frac{1}{\lambda^4} h(y)^2 + 2g(y)^2 > 0$$

□

Similar to [11], we obtain a convex upper bound on our objective. Evaluation of the upper bound  $\bar{F}(\lambda)$  requires using only the  $\lambda$ -oracle. Importantly, this alternative bound  $\bar{F}(\lambda)$  does not depend on the slack variable  $\xi_i$ , so it can be used with algorithms that optimize the unconstrained formulation (4), such as SGD, SDCA and FW. As in [11], we minimize  $\bar{F}(\lambda)$  using *binary search* over  $\lambda$ . The algorithm keeps track of  $y_{\lambda_t}$ , the label returned by the  $\lambda$ -oracle for intermediate values  $\lambda_t$  encountered during the binary search, and returns the maximum label  $\max_t \Phi(y_{\lambda_t})$ . This algorithm focuses on the upper bound  $\min_{\lambda > 0} \bar{F}(\lambda)$ , and interacts with the target function  $\Phi$  only through evaluations  $\Phi(y_{\lambda_t})$  (similar to [11]).

## Appendix B An example of label mapping

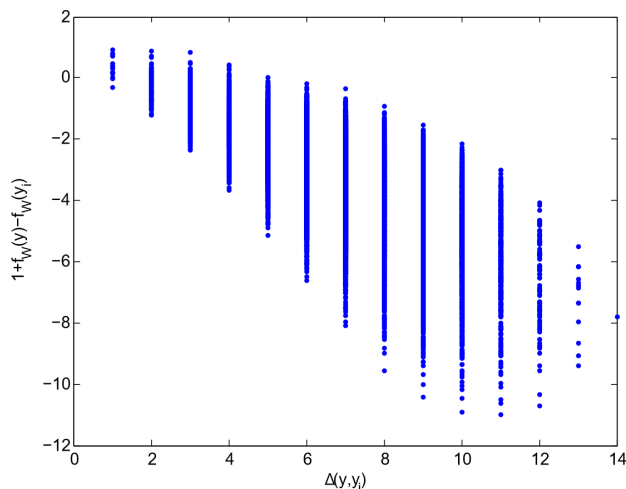

Figure 5: A snapshot of labels during optimization with Yeast dataset. Each  $2^{14} - 1$  labels is shown as a pot in the figure 5. X-axis is the  $\Delta(y, y_i)$  and Y-axis is  $1 + f_W(y) - f_W(y_i)$ .

## Appendix C Monotonicity of $h$ and $g$ in $\lambda$

*Proof.* Let  $g_1 = g(y_{\lambda_1})$ ,  $h_1 = h(y_{\lambda_1})$ ,  $g_2 = g(y_{\lambda_2})$ , and  $h_2 = h(y_{\lambda_2})$ .

$$\begin{aligned} h_1 + \lambda_1 g_1 &\geq h_2 + \lambda_1 g_2, & h_2 + \lambda_2 g_2 &\geq h_1 + \lambda_2 g_1 \\ \Leftrightarrow h_1 - h_2 + \lambda_1(g_1 - g_2) &\geq 0, & -h_1 + h_2 + \lambda_2(g_2 - g_1) &\geq 0 \\ \Leftrightarrow (g_2 - g_1)(\lambda_2 - \lambda_1) &\geq 0 \end{aligned}$$

For  $h$ , change the role of  $g$  and  $h$ . □

## Appendix D Improvements for the binary search

### Appendix D.1 Early stopping

If  $L = [\lambda_m, \lambda_M]$ , and both endpoints have the same label, i.e.,  $y_{\lambda_m} = y_{\lambda_M}$ , then we can terminate the binary search safely because from lemma 4, it follows that the solution  $y_\lambda$  will not change in this segment.

### Appendix D.2 Suboptimality bound

Let  $K(\lambda)$  be the value of the  $\lambda$ -oracle. i.e.,

$$K(\lambda) = \max_{y \in \mathcal{Y}} h(y) + \lambda g(y). \quad (14)$$

**Lemma 5.**  $\Phi^*$  is upper bounded by

$$\Phi(y^*) \leq \frac{K(\lambda)^2}{4\lambda} \quad (15)$$

*Proof.*

$$\begin{aligned}
 h(y) + \lambda g(y) &\leq K(\lambda) \\
 \iff g(y)(h(y) + \lambda g(y)) &\leq g(y)K(\lambda) \\
 \iff \Phi(y) &\leq g(y)K(\lambda) - \lambda g(y)^2 \\
 &= -\lambda \left( g(y) - \frac{K(\lambda)}{2\lambda} \right)^2 + \frac{K(\lambda)^2}{4\lambda} \leq \frac{K(\lambda)^2}{4\lambda}
 \end{aligned}$$

□

## Appendix E Proof of the limitation of the $\lambda$ -oracle search

**Theorem 1.** Let  $\hat{H} = \max_y h(y)$  and  $\hat{G} = \max_y g(y)$ . For any  $\epsilon > 0$ , there exists a problem with 3 labels such that for any  $\lambda \geq 0$ ,  $y_\lambda = \operatorname{argmin}_{y \in \mathcal{Y}} \Phi(y) < \epsilon$ , while  $\Phi(y^*) = \frac{1}{4} \hat{H} \hat{G}$ . Let  $\hat{H} = \max_y h(y)$  and  $\hat{G} = \max_y g(y)$ . For any  $\epsilon > 0$  and  $\lambda > 0$ , there exists a problem of 3 labels that  $y_\lambda = \operatorname{argmin}_{y \in \mathcal{Y}} \Phi(y) < \epsilon$ , and  $\Phi(y^*) - \Phi(y_\lambda) = \frac{1}{4} \hat{H} \hat{G}$ .

*Proof.* We will first prove following lemma which will be used in the proof.

**Lemma 6.** Let  $A = [A_1 \ A_2] \in \mathbb{R}^2$ ,  $B = [B_1 \ B_2] \in \mathbb{R}^2$ , and  $C = [C_1 \ C_2] \in \mathbb{R}^2$ , and  $A_1 < B_1 < C_1$ . If  $B$  is under the line  $\overline{AC}$ , i.e.,  $\exists t, 0 \leq t \leq 1, D = tA + (1-t)C$ ,  $D_1 = B_1$ ,  $D_2 > B_2$ . Then,  $\forall \lambda \geq 0$ ,  $v = [1 \ \lambda] \in \mathbb{R}^2$ , such that

$$v \cdot B > v \cdot A \text{ and } v \cdot B > v \cdot C \quad (16)$$

*Proof.* Translate vectors  $A, B$ , and  $C$  into coordinates of  $[0, A_2], [a, b], [C_1, 0]$  by adding a vector  $[-A_1, -C_2]$  to each vectors  $A, B$ , and  $C$ , since it does not change  $B - A$  or  $B - C$ . Let  $X = C_1$  and  $Y = A_2$ .

If  $0 \leq \lambda \leq \frac{X}{Y}$ , then  $v \cdot A = \lambda Y \leq X = v \cdot C$ .  $v \cdot (B - C) > 0 \iff (a - X) + \lambda b > 0$  corresponds to all the points above line  $\overline{AC}$ . Similarly, if  $\lambda \geq \frac{X}{Y}$ , (16) corresponds to  $a + \lambda(b - Y) > 0$  is also all the points above  $\overline{AC}$ . □

From lemma 6, if  $y_1, y_2 \in \mathcal{Y}$ , then all the labels which lies under line  $y_1$  and  $y_2$  will not be found by  $\lambda$ -oracle. In the adversarial case, this holds when label lies on the line also. Therefore, Theorem 1 holds when there exists three labels, for arbitrary small  $\epsilon > 0$ ,  $A = [\epsilon, \hat{G}]$ ,  $B = [\hat{H}, \epsilon]$ , and  $C = [\frac{1}{2}\hat{H}, \frac{1}{2}\hat{G}]$ ,  $\mathcal{Y} = \{A, B, C\}$ . In this case  $\hat{\Phi} \approx 0$ . □

## Appendix F Angular search

We first introduce needed notations.  $\partial^\perp(a)$  be the perpendicular slope of  $a$ , i.e.,  $\partial^\perp(a) = -\frac{1}{\partial(a)} = -\frac{a_1}{a_2}$ . For  $A \subseteq \mathbb{R}^2$ , let label set restricted to  $A$  as  $\vec{\mathcal{Y}}_A = \vec{\mathcal{Y}} \cap A$ , and  $y_{\lambda, A} = \mathcal{O}(\lambda, A) = \operatorname{argmax}_{y \in \mathcal{Y}, \vec{y} \in A} h(y) + \lambda g(y) = \operatorname{argmax}_{\vec{y} \in \vec{\mathcal{Y}}_A} [\vec{y}]_1 + \lambda [\vec{y}]_2$ . Note that if  $A = \mathbb{R}^2$ ,  $y_{\lambda, \mathbb{R}^2} = y_\lambda$ . For  $P, Q \in \mathbb{R}^2$ , define  $\Lambda(P, Q)$  to be the area below the line  $\overline{PQ}$ , i.e.,  $\Lambda(P, Q) = \{\vec{y} \in \mathbb{R}^2 | [\vec{y}]_2 - [P]_2 \leq \partial^\perp(Q - P)([\vec{y}]_2 - [P]_2)\}$ .  $\Upsilon_\lambda = \{\vec{y} \in \mathbb{R}^2 | \vec{\Phi}(\vec{y}) = [\vec{y}]_1 \cdot [\vec{y}]_2 \geq \vec{\Phi}(\vec{y}_{\lambda, A})\}$  be the area above  $C_\lambda$ , and  $\underline{\Upsilon}_\lambda = \{\vec{y} \in \mathbb{R}^2 | \vec{\Phi}(\vec{y}) = [\vec{y}]_1 \cdot [\vec{y}]_2 \leq \vec{\Phi}(\vec{y}_{\lambda, A})\}$  be the area below  $C_\lambda$ .

Recall the *constrained  $\lambda$ -oracle* defined in (8):

$$y_{\lambda, \alpha, \beta} = \mathcal{O}_c(\lambda, \alpha, \beta) = \max_{y \in \mathcal{Y}, \alpha h(y) \geq g(y), \beta h(y) < g(y)} \mathcal{L}_\lambda(y)$$

where  $\alpha, \beta \in \mathbb{R}_+$  and  $\alpha \geq \beta > 0$ . Let  $A(\alpha, \beta) \subseteq \mathbb{R}^2$  be the restricted search space, i.e.,  $A(\alpha, \beta) = \{a \in \mathbb{R}^2 | \beta < \partial(a) \leq \alpha\}$ . Constrained  $\lambda$ -oracle reveals maximal  $\mathcal{L}_\lambda$  label within restricted area defined by  $\alpha$  and  $\beta$ . The area is bounded by two lines whose slope is  $\alpha$  and  $\beta$ . Define a pair  $(\alpha, \beta)$ ,  $\alpha, \beta \in \mathbb{R}_+$ ,  $\alpha \geq \beta > 0$  as an *angle*. The angular search recursively divides an angle into two different angles, which we call the procedure as a *split*. For  $\alpha \geq \beta \geq 0$ , let  $\lambda = \frac{1}{\sqrt{\alpha\beta}}$ ,  $z = \vec{y}_{\lambda, \alpha, \beta}$  and  $z' = [\lambda[z]_2, \frac{1}{\lambda}[z]_1]$ . Let  $P$  be the point among  $z$  and  $z'$  which has the greater slope (any if two equal), and  $Q$  be the other

point, i.e., if  $\partial(z) \geq \partial(z')$ ,  $P = z$  and  $Q = z'$ , otherwise  $P = z'$  and  $Q = z$ . Let  $R = \left[ \sqrt{\lambda[z]_1 \cdot [z]_2} \sqrt{\frac{1}{\lambda}[z]_1 \cdot [z]_2} \right]$ . Define  $\text{split}(\alpha, \beta)$  as a procedure divides  $(\alpha, \beta)$  into two angles  $(\alpha^+, \gamma^+) = (\partial(P), \partial(R))$  and  $(\gamma^+, \beta^+) = (\partial(R), \partial(Q))$ . First, show that  $\partial(P)$  and  $\partial(Q)$  are in between  $\alpha$  and  $\beta$ , and  $\partial(R)$  is between  $\partial(P)$  and  $\partial(Q)$ .

**Lemma 7.** For each  $\text{split}(\alpha, \beta)$ ,

$$\beta \leq \partial(Q) \leq \partial(R) \leq \partial(P) \leq \alpha$$

*Proof.*  $\beta \leq \partial(z) \leq \alpha$  follows from the definition of constrained  $\lambda$ -oracle in (8).

$$\partial(z') = \frac{1}{\lambda^2 \partial(z)} = \frac{\alpha\beta}{\partial(z)} \implies \beta \leq \partial(z') \leq \alpha \implies \beta \leq \partial(Q) \leq \partial(P) \leq \alpha.$$

$$\partial(Q) \leq \partial(R) \leq \partial(P) \iff \min \left\{ \partial(z), \frac{1}{\lambda^2 \partial(z)} \right\} \leq \frac{1}{\lambda} \leq \max \left\{ \partial(z), \frac{1}{\lambda^2 \partial(z)} \right\} \text{ from } \forall a, b \in \mathbb{R}_+, b \leq a \implies b \leq \sqrt{ab} \leq a. \quad \square$$

After each split, the union of the divided angle  $(\alpha^+, \gamma)$  and  $(\gamma, \beta^+)$  can be smaller than angle  $(\alpha, \beta)$ . However, following lemma shows it is safe to use  $(\alpha^+, \gamma)$  and  $(\gamma, \beta^+)$  when our objective is to find  $y^*$ .

**Lemma 8.**

$$\forall a \in \vec{\mathcal{Y}}_{A(\alpha, \beta)}, \Phi(a) > \Phi(y_{\lambda, \alpha, \beta}) \implies \beta^+ < \partial(a) < \alpha^+$$

*Proof.* From lemma 2,  $\vec{\mathcal{Y}}_{A(\alpha, \beta)} \subseteq \Lambda(P, Q)$ . Let  $U = \{a \in \mathbb{R}^2 | \partial(a) \geq \alpha_+ = \partial(P)\}$ ,  $B = \{a \in \mathbb{R}^2 | \partial(a) \leq \beta_+ = \partial(Q)\}$ , and two contours of function  $C = \{a \in \mathbb{R}^2 | \vec{\Phi}(a) = \Phi(y_{\lambda, \alpha, \beta})\}$ ,  $S = \{a \in \mathbb{R}^2 | \mathcal{L}_\lambda(a) = \mathcal{L}_\lambda(\vec{y}_{\lambda, \alpha, \beta})\}$ .  $S$  is the upper bound of  $\Lambda(P, Q)$ , and  $C$  is the upper bound of  $\underline{C} = \{a \in \mathbb{R}^2 | \vec{\Phi}(a) \leq \Phi(y_{\lambda, \alpha, \beta})\}$ .  $P$  and  $Q$  are the intersections of  $C$  and  $S$ . For area of  $U$  and  $B$ ,  $S$  is under  $C$ , therefore,  $\Lambda(P, Q) \cap U \subseteq \underline{C}$ , and  $\Lambda(P, Q) \cap B \subseteq \underline{C}$ . It implies that  $\forall a \in (\Lambda(P, Q) \cap U) \cup (\Lambda(P, Q) \cap B) \implies \vec{\Phi}(a) \leq \Phi(y_{\lambda, \alpha, \beta})$ . And the lemma follows from  $A(\alpha, \beta) = U \cup B \cup \{a \in \mathbb{R}^2 | \beta^+ < \partial(a) < \alpha^+\}$ .  $\square$

We associate a quantity we call a *capacity* of an angle, which is used to prove the suboptimality of the algorithm. For an angle  $(\alpha, \beta)$ , the capacity of an angle  $v(\alpha, \beta)$  is

$$v(\alpha, \beta) := \sqrt{\frac{\alpha}{\beta}}$$

Note that from the definition of an angle,  $v(\alpha, \beta) \geq 1$ . First show that the capacity of angle decreases exponentially for each split.

**Lemma 9.** For any angle  $(\alpha, \beta)$  and its split  $(\alpha^+, \gamma^+)$  and  $(\gamma^+, \beta^+)$ ,

$$v(\alpha, \beta) \geq v(\alpha^+, \beta^+) = v(\alpha^+, \gamma^+)^2 = v(\gamma^+, \beta^+)^2$$

*Proof.* Assume  $\partial(P) \geq \partial(Q)$  (the other case is follows the same proof with changing the role of  $P$  and  $Q$ ), then  $\alpha^+ = \partial(P)$  and  $\beta^+ = \partial(Q)$ .  $\partial(Q) = \frac{1}{\lambda^2 \partial(P)} = \frac{\alpha\beta}{\partial(P)}$ ,  $v(\alpha^+, \beta^+) = v(\partial(P), \partial(Q)) = \lambda \partial(P) = \frac{\partial(P)}{\sqrt{\alpha\beta}}$ . Since  $\alpha$  is the upper bound and  $\beta$  is the lower bound of  $\partial(P)$ ,  $\sqrt{\frac{\beta}{\alpha}} \leq v(\partial(P), \partial(Q)) \leq \sqrt{\frac{\alpha}{\beta}}$ . Last two equalities in the lemma are from  $v(\partial(P), \partial(R)) = v(\partial(R), \partial(Q)) = \sqrt{\frac{\partial(P)}{\alpha\beta}}$  by plugging in the coordinate of  $R$ .  $\square$

**Lemma 10.** Let  $\mathcal{B}(a) = \frac{1}{4} \left( a + \frac{1}{a} \right)^2$ . The suboptimality bound of an angle  $(\alpha, \beta)$  with  $\lambda = \frac{1}{\sqrt{\alpha\beta}}$  is

$$\frac{\max_{\vec{y} \in \vec{\mathcal{Y}}_{A(\alpha, \beta)}} \vec{\Phi}(\vec{y})}{\Phi(y_{\lambda, \alpha, \beta})} \leq \mathcal{B}(v(\alpha, \beta)).$$

*Proof.* From lemma 2,  $\vec{\mathcal{Y}}_{A(\alpha,\beta)} \subseteq \Lambda(P, Q) = \Lambda(z, z')$ . Let  $\partial(z) = \gamma$ . From 7,  $\beta \leq \gamma \leq \alpha$ . Let  $m = \operatorname{argmax}_{a \in \Lambda(z, z')} \vec{\Phi}(a)$ .  $m$  is on line  $\overline{zz'}$  otherwise we can move  $m$  increasing direction of each axis till it meets the boundary  $\overline{zz'}$  and  $\Phi$  only increases, thus  $m = tz + (1-t)z'$ .  $\vec{\Phi}(m) = \max_t \vec{\Phi}(tz + (1-t)z')$ .  $\frac{\partial \vec{\Phi}(tz + (1-t)z')}{\partial t} = 0 \implies t = \frac{1}{2}$ .  $m = \frac{1}{2}[z_1 + \lambda z_2 \quad z_2 + \frac{z_1}{\lambda}]$ .

$$\begin{aligned} \frac{\max_{\vec{y} \in \vec{\mathcal{Y}}_{A(\alpha,\beta)}} \vec{\Phi}(\vec{y})}{\Phi(y_{\lambda,\alpha,\beta})} &= \frac{1}{4} \left( \sqrt{\frac{z_1}{\lambda z_2}} + \sqrt{\frac{\lambda z_2}{z_1}} \right)^2 \\ &= \frac{1}{4} \left( \sqrt{\frac{\sqrt{\alpha\beta}}{\gamma}} + \sqrt{\frac{\gamma}{\sqrt{\alpha\beta}}} \right)^2 \end{aligned}$$

Since  $v(a) = v\left(\frac{1}{a}\right)$  and  $v(a)$  increases monotonically for  $a \geq 1$ ,

$$\mathcal{B}(a) \leq \mathcal{B}(b) \iff \max \left\{ a, \frac{1}{a} \right\} \leq \max \left\{ b, \frac{1}{b} \right\}$$

If  $\frac{\sqrt{\alpha\beta}}{\gamma} \geq \frac{\gamma}{\sqrt{\alpha\beta}}$ , then  $\frac{\sqrt{\alpha\beta}}{\gamma} \leq \sqrt{\frac{\alpha}{\beta}}$  since  $\gamma \geq \beta$ . If  $\frac{\gamma}{\sqrt{\alpha\beta}} \geq \frac{\sqrt{\alpha\beta}}{\gamma}$ , then  $\frac{\gamma}{\sqrt{\alpha\beta}} \leq \sqrt{\frac{\alpha}{\beta}}$  since  $\gamma \leq \alpha$ . Therefore,  $\frac{\max_{\vec{y} \in \vec{\mathcal{Y}}_{A(\alpha,\beta)}} \vec{\Phi}(\vec{y})}{\Phi(y_{\lambda,\alpha,\beta})} = \mathcal{B}\left(\frac{\sqrt{\alpha\beta}}{\gamma}\right) \leq \mathcal{B}(v(\alpha, \beta))$ .  $\square$

Now we can prove the theorems.

**Theorem 2.** Angular search described in algorithm 2 finds optimum  $y^* = \operatorname{argmax}_{y \in \mathcal{Y}} \Phi(y)$  at most  $t = 2M + 1$  iteration where  $M$  is the number of the labels.

*Proof.* Denote  $y_t, \alpha_t, \beta_t, z_t, z'_t, K_t^1$ , and  $K_t^2$  for  $y, \alpha, \beta, z, z', K^1$ , and  $K^2$  at iteration  $t$  respectively.  $\mathcal{A}(\alpha_t, \beta_t)$  is the search space at each iteration  $t$ . At the first iteration  $t = 1$ , the search space contains all the labels with positive  $\Phi$ , i.e.,  $\{y | \Phi(y) \geq 0\} \subseteq \mathcal{A}(\infty, 0)$ . At iteration  $t > 1$ , firstly, when  $y_t = \emptyset$ , the search area  $\mathcal{A}(\alpha_t, \beta_t)$  is removed from the search since  $y_t = \emptyset$  implies there is no label inside  $\mathcal{A}(\alpha_t, \beta_t)$ . Secondly, when  $y_t \neq \emptyset$ ,  $\mathcal{A}(\alpha_t, \beta_t)$  is dequeued, and  $K_t^1$  and  $K_t^2$  is enqueued. From lemma 8, at every step, we are ensured that do not lose  $y^*$ . By using strict inequalities in the constrained oracle with valuable  $s$ , we can ensure  $y_t$  which oracle returns is an unseen label. Note that split only happens if a label is found, i.e.,  $y_t \neq \emptyset$ . Therefore, there can be only  $M$  splits, and each split can be viewed as a branch in the binary tree, and the number of queries are the number of nodes. Maximum number of the nodes with  $M$  branches are  $2M + 1$ .  $\square$

**Theorem 4.** In angular search, described in Algorithm 2, at iteration  $t$ ,

$$\Phi(\hat{y}^t) \geq \Phi(y^*) (v_1^{-\frac{4}{t+1}})$$

where  $\hat{y}^t = \operatorname{argmax}_t y^t$  is the optimum up to  $t$ ,  $v_1 = \max \left\{ \frac{\lambda_0}{\partial(\vec{y}_1)}, \frac{\partial(\vec{y}_1)}{\lambda_0} \right\}$ ,  $\lambda_0$  is the initial  $\lambda$  used, and  $y_1$  is the first label returned by the constrained  $\lambda$ -oracle.

*Proof.* After  $t \geq 2^r - 1$  iteration as in algorithm 2 where  $r$  is an integer, for all the angle  $(\alpha, \beta)$  in the queue  $Q$ ,  $v(\alpha, \beta) \leq (v_1)^{2^{1-r}}$ . This follows from the fact that since the algorithm uses the depth first search, after  $2^r - 1$  iterations all the nodes at the search is at least  $r$ . At each iteration, for a angle, the capacity is square rooted from the lemma 9, and the depth is increased by one. And the theorem follows from the fact that after  $t \geq 2^r - 1$  iterations, all splits are at depth  $r' \geq r$ , and at least one of the split contains the optimum with suboptimality bound with lemma 10. Thus,

$$\frac{\Phi(y^*)}{\Phi(\hat{y})} \leq \mathcal{B}\left((v_1)^{2^{1-r}}\right) < (v_1)^{2^{2-r}} \leq (v_1)^{\frac{4}{t+1}}$$

$\square$

**Theorem 5.** Assuming  $\Phi(y^*) > \phi$ , angular search described in algorithm 2 with  $\lambda_0 = \frac{\hat{G}}{\hat{H}}$ ,  $\alpha_0 = \frac{\hat{G}^2}{\phi}$ ,  $\beta_0 = \frac{\phi}{\hat{H}^2}$ , finds  $\epsilon$ -optimal solution,  $\Phi(y) \geq (1 - \epsilon)\Phi(y^*)$ , in  $T$  queries and  $O(T)$  operations where  $T = 4 \log \left( \frac{\hat{G}\hat{H}}{\phi} \right) \cdot \frac{1}{\epsilon}$ , and  $\delta$ -optimal solution,  $\Phi(y) \geq \Phi(y^*) - \delta$ , in  $T'$  queries and  $O(T')$  operations where  $T' = 4 \log \left( \frac{\hat{G}\hat{H}}{\phi} \right) \cdot \frac{\Phi(y^*)}{\delta}$ .

*Proof.*  $\Phi(y^*) > \phi \Leftrightarrow \frac{\phi}{\hat{H}^2} < \frac{g(y^*)}{h(y^*)} = \partial(y^*) < \frac{\hat{G}^2}{\phi}$ .  $v_1 = \max \left\{ \frac{\lambda_0}{\partial(y_1)}, \frac{\partial(y_1)}{\lambda_0} \right\}$  from Theorem 4. Algorithm finds  $y^*$  if  $\beta \leq \partial(y^*) \leq \alpha$ , thus set  $\alpha = \frac{\hat{G}^2}{\phi}$  and  $\beta = \frac{\phi}{\hat{H}^2}$ . Also from the definition of constrained  $\lambda$ -oracle,  $\beta = \frac{\phi}{\hat{H}^2} \leq \partial(y_1) \leq \alpha = \frac{\hat{G}^2}{\phi}$ . Therefore,  $v_1 \leq \max \left\{ \frac{\lambda_0}{\partial(y_1)}, \frac{\partial(y_1)}{\lambda_0} \right\}$ . And the upper bound of two terms equal when  $\lambda_0 = \frac{\hat{G}}{\hat{H}}$ , then  $v_1 \leq \frac{\hat{G}\hat{H}}{\phi}$ .  $\delta$  bound follows plugging in the upper bound of  $v_1$ , and  $\epsilon = \frac{\delta}{\Phi(y^*)}$ .  $\square$

## Appendix G Illustration of the angular search

Following figure 6 illustrates Angular search. Block dots are the labels from figure 5. Blue X denotes the new label returned by the oracle. Red X is the maximum point. Two straight lines are the upper bound and the lower bound used by the constrained oracle. Constrained oracle returns a blue dot between the upper and lower bounds. We can draw a line that passes blue X that no label can be above the line. Then, split the angle into half. This process continues until the  $y^*$  is found.

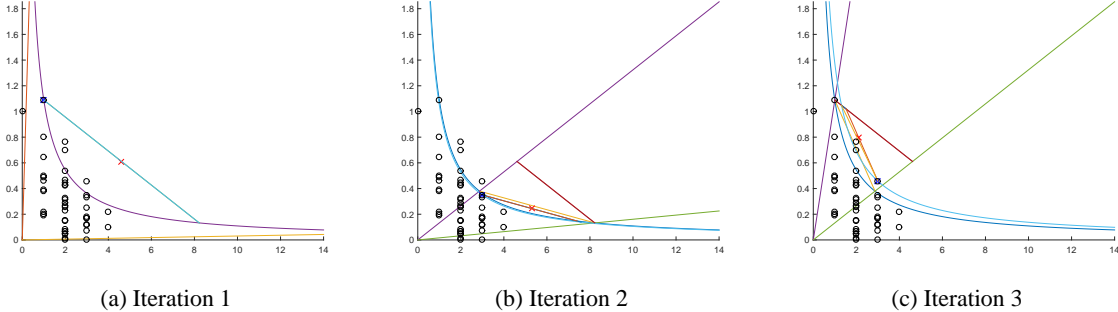

Figure 6: Illustration of the Angular search.

## Appendix H Limitation of the constraint $\lambda$ -oracle search

**Theorem 3.** Any search algorithm accessing labels only through  $\lambda$ -oracle with any number of the linear constraints cannot find  $y^*$  in less than  $M$  iterations in the worst case where  $M$  is the number of labels.

*Proof.* We show this in the perspective of a game between a searcher and an oracle. At each iteration, the searcher query the oracle with  $\lambda$  and the search space denoted as  $\mathcal{A}$ , and the oracle reveals a label according to the query. And the claim is that with any choice of  $M - 1$  queries, for each query the oracle can either give an consistent label or indicate that there is no label in  $\mathcal{A}$  such that after  $M - 1$  queries the oracle provides an unseen label  $y^*$  which has bigger  $\Phi$  than all previous revealed labels.

Denote each query at iteration  $t$  with  $\lambda_t > 0$  and a query closed and convex set  $\mathcal{A}_t \subseteq \mathbb{R}^2$ , and denote the revealed label at iteration  $t$  as  $y_t$ . We will use  $y_t = \emptyset$  to denote that there is no label inside query space  $\mathcal{A}_t$ . Let  $\mathcal{Y}_t = \{y_{t'} | t' < t\}$ .

Algorithm 3 describes the pseudo code for generating such  $y_t$ . The core of the algorithm is maintaining a rectangular area  $\mathcal{R}_t$  for each iteration  $t$  with following properties. Last two properties are for  $y_t$ .

---

**Algorithm 3** Construct a consistent label set  $\mathcal{Y}$ .
 

---

**Input:**  $\{\lambda_t, \mathcal{A}_t\}_{t=1}^{M-1}, \lambda_t > 0, \mathcal{A}_t \subseteq \mathbb{R}^2, \mathcal{A}_t$  is closed and convex region.

**Output:**  $\{y_t \in \mathbb{R}^2\}_{t=1}^{M-1}, y^* \in \mathbb{R}^2$ 
**Initialize:**  $\mathcal{R}_0 = \{(a, b) | 0 < a, 0 < b\}, \mathcal{Y}_0 = \emptyset$ .

```

1: for  $t = 1, 2, \dots, M - 1$  do
2:   if  $\mathcal{Y}_{t-1} \cap \mathcal{A}_t = \emptyset$  then
3:      $\tilde{y} = \operatorname{argmax}_{y \in \mathcal{Y}_t} h(y) + \lambda_t g(y)$ .
4:      $\tilde{\mathcal{R}} = \mathcal{R}_{t-1} \cap \{y | h(y) + \lambda_t g(y) < h(\tilde{y}) + \lambda_t g(\tilde{y}) \text{ or } y \notin \mathcal{A}_t\}$ .
5:   else
6:      $\tilde{y} = \emptyset, \tilde{\mathcal{R}} = \mathcal{R}_{t-1} - \mathcal{A}_t$ .
7:   if  $\tilde{\mathcal{R}} \neq \emptyset$  then
8:      $y_t = \emptyset, \mathcal{R}_t = \operatorname{FindRect}(\tilde{\mathcal{R}})$ 
9:   else
10:     $y_t = \operatorname{FindPoint}(\mathcal{R}_{t-1}, \lambda_t)$ .
11:     $\mathcal{R}_t = \operatorname{FindRect}(\operatorname{Shrink}(\mathcal{R}_{t-1}, y_t, \lambda_t))$ .
12:   if  $y_t \neq \emptyset$  then
13:      $\mathcal{Y} = \mathcal{Y} \cup \{y_t\}$ .
14: Pick any  $y^* \in \mathcal{R}_{M-1}$ 
    
```

---

1.  $\forall t' < t, \forall y \in \mathcal{R}_t, \Phi(y) > \Phi(y_{t'})$ .
2.  $\forall t' < t, \forall y \in \mathcal{R}_t \cap \mathcal{A}_{t'}, h(y_{t'}) + \lambda_{t'} g(y_{t'}) > h(y) + \lambda_{t'} g(y)$ .
3.  $\mathcal{R}_t \subseteq \mathcal{R}_{t-1}$ .
4.  $\mathcal{R}_t$  is a non-empty open set.
5.  $y_t \in \mathcal{R}_t \cap \mathcal{A}_t$
6.  $y_t = \operatorname{argmax}_{y \in \mathcal{Y}_t \cap \mathcal{A}_t} h(y) + \lambda_t g(y)$ .

Note that if these properties holds till iteration  $M$ , we can simply set  $y^*$  as any label in  $\mathcal{R}_M$  which proves the claim.

First, we show that property 4 is true.  $\mathcal{R}_0$  is a non-empty open set. Consider iteration  $t$ , and assume  $\mathcal{R}_{t-1}$  is a non-empty open set. Then  $\tilde{\mathcal{R}}$  is an open set since  $\mathcal{R}_{t-1}$  is an open set. There are two unknown functions, *Shrink* and *FindRect*. For open set  $A \subseteq \mathbb{R}^2, y \in \mathbb{R}^2$ , let  $\operatorname{Shrink}(A, y, \lambda) = A - \{y' | \Phi(y') \leq \Phi(y) \text{ or } h(y') + \lambda g(y') \geq h(y) + \lambda g(y)\}$ . Note that  $\operatorname{Shrink}(A, y, \lambda) \subseteq A$ , and  $\operatorname{Shrink}(A, y, \lambda)$  is an open set. Assume now that there exists a  $y$  such that  $\operatorname{Shrink}(\mathcal{R}_{t-1}, y, \lambda_t) \neq \emptyset$  and  $\operatorname{FindPoint}(\mathcal{R}_{t-1}, \lambda_t)$  returns such  $y$ . Function *FindPoint* will be given later.  $\operatorname{FindRect}(A)$  returns an open non-empty rectangle inside  $A$ . Note that  $\operatorname{Rect}(A) \subseteq A$ , and since input to *Rect* is always non empty open set, such rectangle exists. Since  $\mathcal{R}_0$  is non-empty open set,  $\forall t, \mathcal{R}_t$  is a non-empty open set.

Property 3 and 5 are easy to check. Property 1 and 2 follows from the fact that  $\forall t \in \{t | y_t \neq \emptyset\}, \forall t' > t, \mathcal{R}_{t'} \subseteq \operatorname{Shrink}(\mathcal{R}_{t-1}, y_t, \lambda_{t-1})$ .

Property 6 follows from the facts that if  $\mathcal{Y}_{t-1} \cap \mathcal{A}_t \neq \emptyset, \tilde{\mathcal{R}} = \emptyset \implies \mathcal{R}_{t-1} \subseteq \{y | h(y) + \lambda_t g(y) > h(\tilde{y}) + \lambda_t g(\tilde{y}) \text{ and } y \in \mathcal{A}_t\}$ , otherwise  $\mathcal{Y}_{t-1} \cap \mathcal{A}_t = \emptyset$ , and  $\mathcal{R}_{t-1} \subseteq \mathcal{A}_t$ .

$\operatorname{FindPoint}(A, \lambda)$  returns any  $y \in A - \{y \in \mathbb{R}^2 | \lambda y_2 = y_1\}$ . Given input  $A$  is always an non-empty open set, such  $y$  exists.  $\operatorname{Shrink}(\mathcal{R}_{t-1}, y, \lambda_t) \neq \emptyset$  is ensured from the fact that two boundaries,  $c = \{y' | \Phi(y') = \Phi(y)\}$  and  $d = \{h(y') + \lambda g(y') = h(y) + \lambda g(y)\}$  meets at  $y$ . Since  $c$  is a convex curve,  $c$  is under  $d$  on one side. Therefore the intersection of set above  $c$  and below  $d$  is non-empty and also open.  $\square$

Appendix I Additional Plots from the Experiments

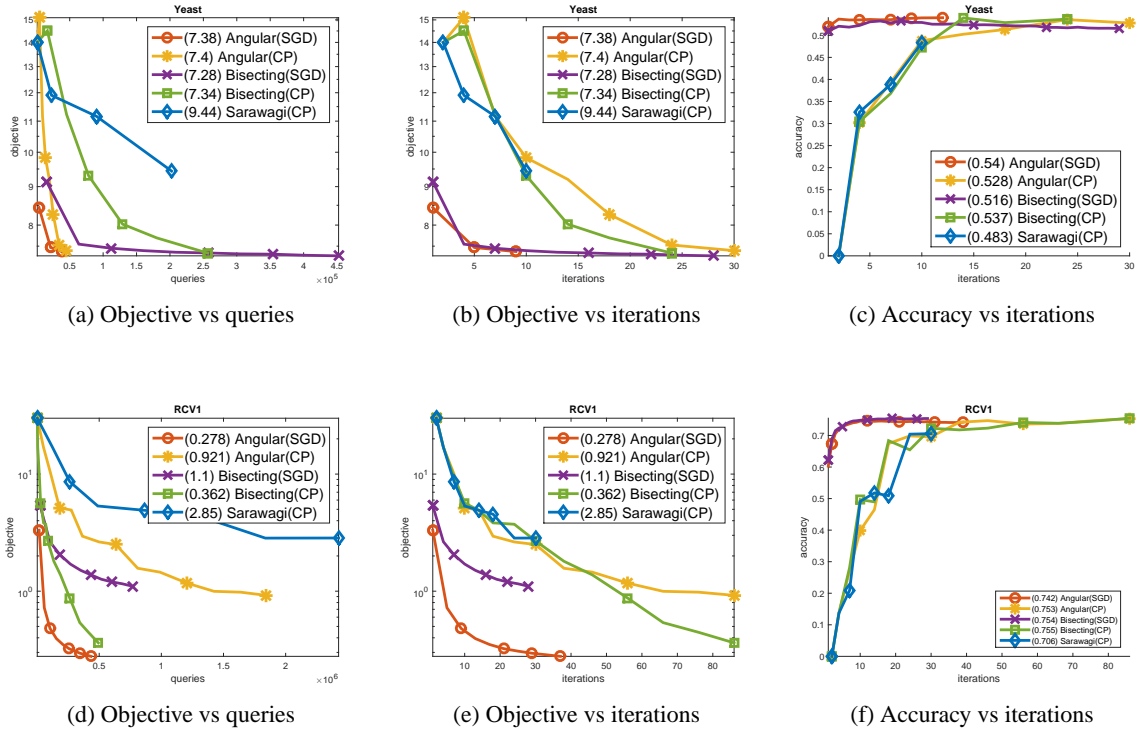

Figure 7: Additional experiment plot (RCV)
